# Supplementary material for: Improving energy storage performance enabled by composition-induced dielectric behavior in PbHfO 3 -based ceramics under low electric fields
Source: Royal Society of Chemistry journal article supplement (doi:10.1039/d4tc02538e), 2024-01-01
Supplement: d4tc02538e1.pdf [file d4tc02538e1.pdf]

## Supporting information

### **Improving energy storage performance enabled by composition-induced dielectric behavior in PbHfO<sub>3</sub>-based ceramics under lower electric fields**

Wenna Chao <sup>a,b</sup>, Jigong Hao <sup>a</sup>, Juan Du <sup>a</sup>, Peng Li <sup>a</sup>, Wei Li <sup>a</sup>, Tongqing Yang <sup>b,\*</sup>

<sup>a</sup> School of Materials Science and Engineering, Laboratory of Sensitive and Devices, Shandong Department of Education, Liaocheng University, Liaocheng 252059, China.

<sup>b</sup> Key Laboratory of Advanced Civil Engineering Materials of the Ministry of Education, Functional Materials Research Laboratory, School of Materials Science and Engineering, Tongji University, 4800 Cao'an Road, Shanghai 201804, China.

E-mail: [yangtongqing@tongji.edu.cn](mailto:yangtongqing@tongji.edu.cn)

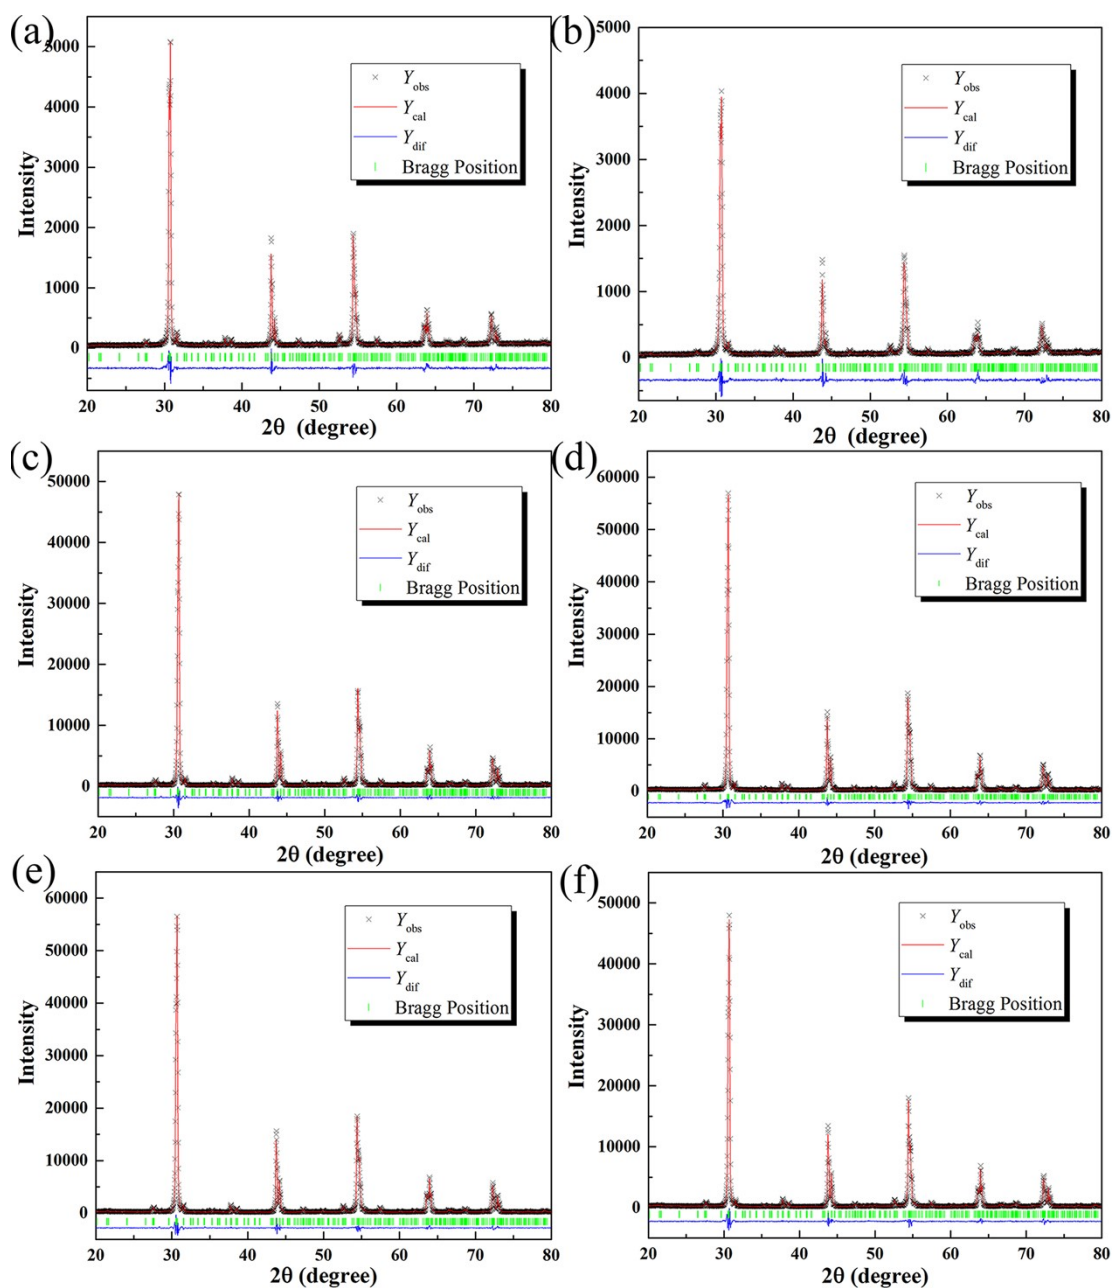

Fig. S1 The Rietveld refinement based on space group of Pbam of PHT<sub>x</sub> ceramics, showing observed (cross), calculated (line) and difference (lower) profiles.

Table S1. The crystal and refined parameters of PHT<sub>x</sub> ceramics.

| Compo sitions        | PHT0                                   | PHT0.5                                 | PHT1                                   | PHT2                                    | PHT3                                    | PHT4                                    |
|----------------------|----------------------------------------|----------------------------------------|----------------------------------------|-----------------------------------------|-----------------------------------------|-----------------------------------------|
| Space group          | Pbam                                   | Pbam                                   | Pbam                                   | Pbam                                    | Pbam                                    | Pbam                                    |
| Unit cell dimensions | a=5.8404Å<br>b=11.7057 Å<br>c=8.1751 Å | a=5.8448 Å<br>b=11.716 Å<br>c=8.1948 Å | a=5.8499Å<br>b=11.7162 Å<br>c=8.2017 Å | a=5.8442 Å<br>b=11.7030 Å<br>c=8.1939 Å | a=5.8387 Å<br>b=11.6913 Å<br>c=8.1859 Å | a=5.8364 Å<br>b=11.6863 Å<br>c=8.1829 Å |

|                     |                                                                      |                                                                      |                                                                      |                                                                      |                                                                      |                                                                      |
|---------------------|----------------------------------------------------------------------|----------------------------------------------------------------------|----------------------------------------------------------------------|----------------------------------------------------------------------|----------------------------------------------------------------------|----------------------------------------------------------------------|
| Volume              | 558.90 Å <sup>3</sup>                                                | 561.16 Å <sup>3</sup>                                                | 562.13 Å <sup>3</sup>                                                | 560.42 Å <sup>3</sup>                                                | 558.79 Å <sup>3</sup>                                                | 558.12 Å <sup>3</sup>                                                |
| Refining parameters | R <sub>wp</sub> =0.1117<br>R <sub>p</sub> =0.0827<br>$\chi^2$ =1.458 | R <sub>wp</sub> =0.1098<br>R <sub>p</sub> =0.0898<br>$\chi^2$ =1.681 | R <sub>wp</sub> =0.1007<br>R <sub>p</sub> =0.0646<br>$\chi^2$ =1.223 | R <sub>wp</sub> =0.0989<br>R <sub>p</sub> =0.0629<br>$\chi^2$ =1.548 | R <sub>wp</sub> =0.0947<br>R <sub>p</sub> =0.0647<br>$\chi^2$ =1.580 | R <sub>wp</sub> =0.0998<br>R <sub>p</sub> =0.0683<br>$\chi^2$ =1.575 |

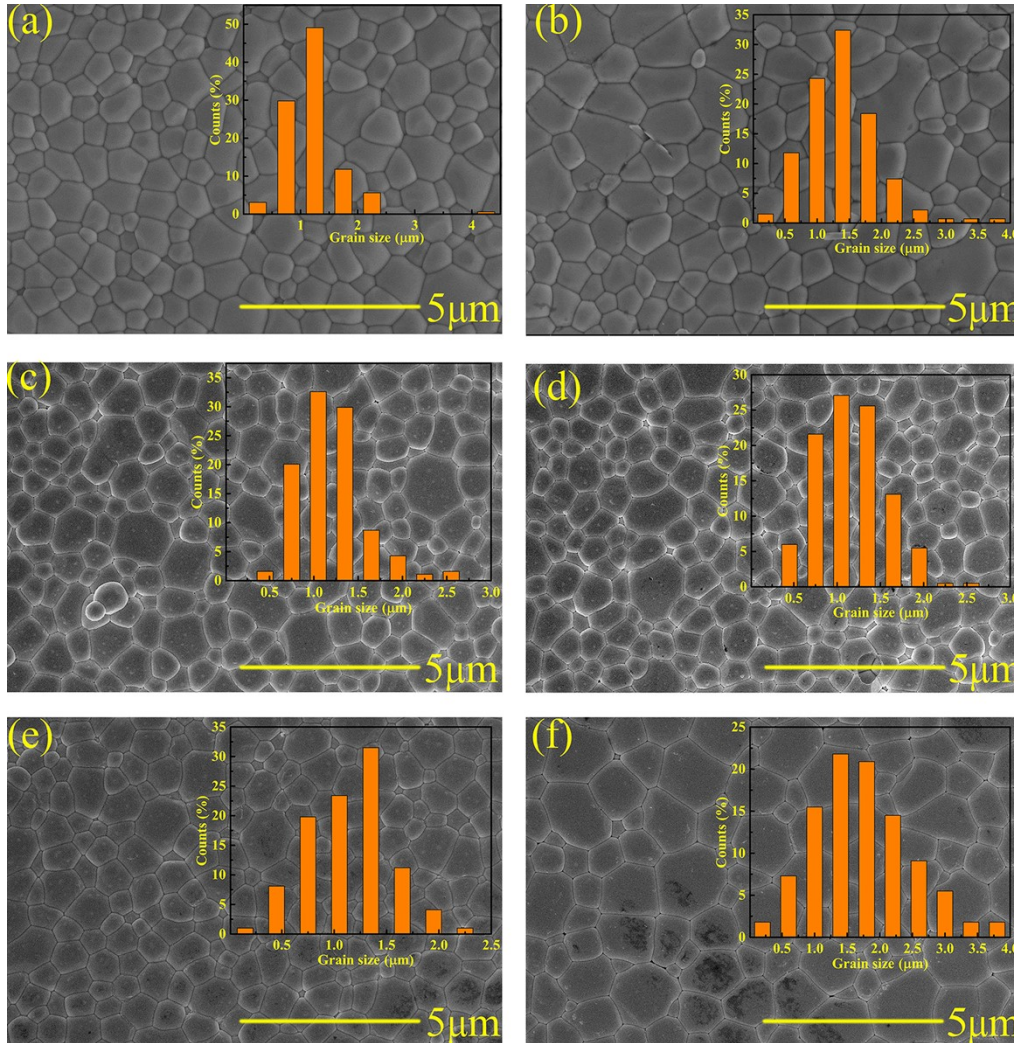

Fig. S2 The surface microstructure images and grain size distribution of the PHT<sub>x</sub> ceramics.

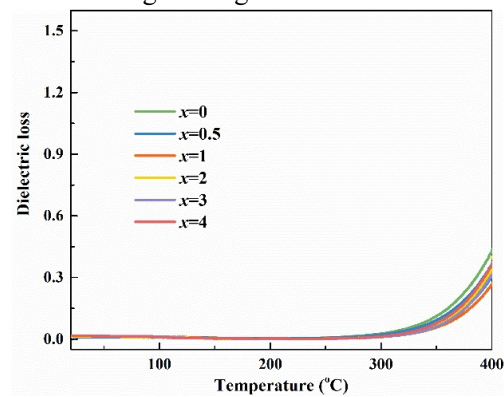

Fig. S3 The dielectric loss as a function of temperature

**Table S2** The average ionic radii of A-site and B-site cations and tolerance factor of PHT $x$  ceramics.

| Composition ( $x$ mol%) | $R_{A\text{-site}}$ (Å) | $R_{B\text{-site}}$ (Å) | Tolerance factor |
|-------------------------|-------------------------|-------------------------|------------------|
| 0                       | 1.49                    | 0.71                    | 0.9661           |
| 0.5                     | 1.49                    | 0.7095                  | 0.9663           |
| 1                       | 1.49                    | 0.709                   | 0.9665           |
| 2                       | 1.49                    | 0.708                   | 0.9670           |
| 3                       | 1.49                    | 0.707                   | 0.9674           |
| 4                       | 1.49                    | 0.706                   | 0.9679           |

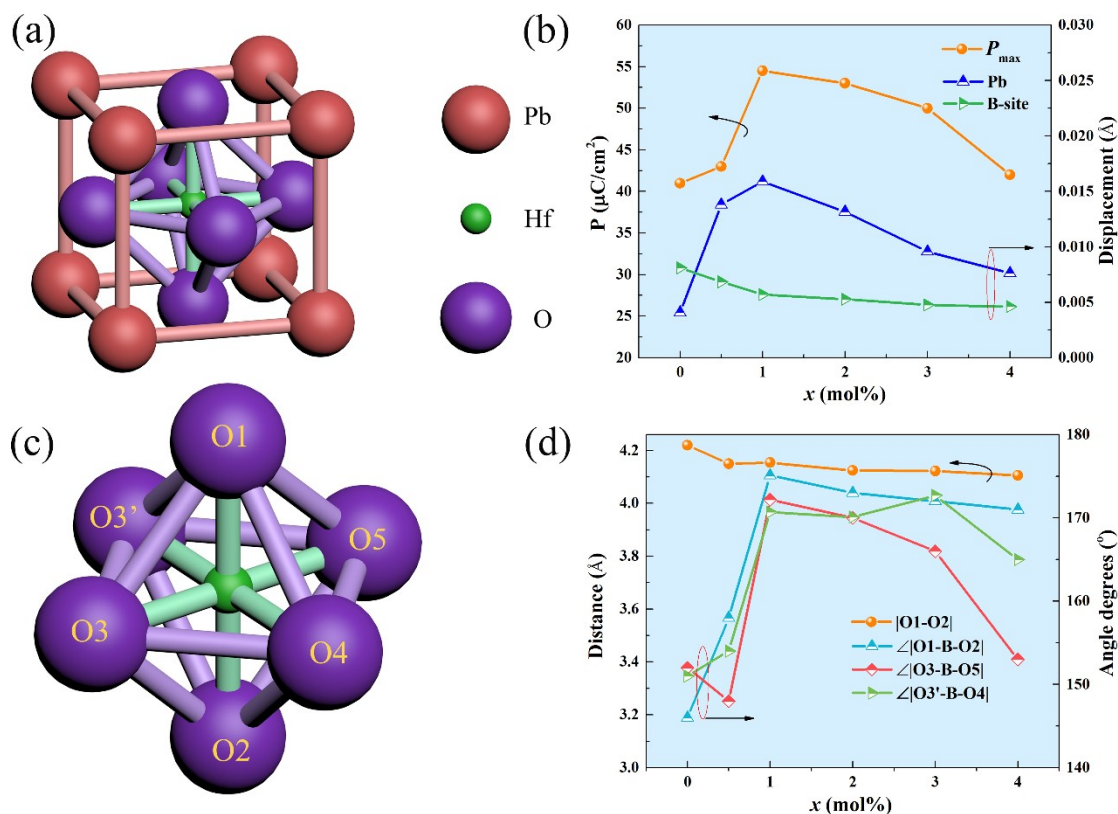

Fig S4 (a)The general perovskite structure of PbHfO<sub>3</sub> ceramics. (b) The evolution of maximum polarization and average displacement of Pb and B-site cations as a function of Ti content. (c) The model of BO<sub>6</sub> octahedral of PbHfO<sub>3</sub> system. and (d) The variation of distance of  $|O1-O2|$  and angle degrees of  $\angle|O1-B-O2|$ ,  $\angle|O3-B-O5|$ , and  $\angle|O3'-B-O4|$  as a function of Ti content.

To better understand the origin of high polarization and the evolution of BO<sub>6</sub> octahedral rotation, the general perovskite structure model of PbHfO<sub>3</sub> ceramics and BO<sub>6</sub> octahedral were established based on the Rietveld refinement results as shown in Fig S4a and c. The displacement of Pb<sup>2+</sup> cations display almost identical trend with the

$P_{\max}$  of different  $\text{Ti}^{4+}$  contents, but the displacement of B-site ions is not the same as that for the displacement of A-site, which is in good agreement with the results in Fig 1.

Two factors contribute to the large polarization intensity, the major contribution is the enhanced displacement of A-site cations, the second contribution is the torsion of oxygen octahedral. As the  $\text{Ti}^{4+}$  content continuous increase, the volume of the  $\text{BO}_6$  octahedral increases, which leading to the position change of A-site cations and further leading to the total displacement dipole strength increase. The maximum polarization firstly presents a rising trend with the increase of Ti content. With the increase of Ti content, the Ti-O bond binding capacity is gradually enhanced, resulting in a decrease in volume. As the displacement of the A-site ions becomes smaller, the polarization strength further decreases, which is consistent with the results in Fig 3a. The distance between O1 and O2 also shows the same trend as in Fig. S4d. We have marked oxygen atoms in different positions in Fig S4c. With the Ti content increases, the angle of  $\angle|\text{O1-B-O2}|$  also shows a similar trend with the change of  $P_{\max}$ , however, the angle of  $\angle|\text{O3-B-O5}|$  and  $\angle|\text{O3'-B-O4}|$  have been declined. Combine the information of Fig S4b and d, it could be concluded that the  $\text{BO}_6$  octahedral is more likely to twist along the c axis (polar axis) rather than a and b axes. These results further illustrate that the high spontaneous polarization is highly possible rooted in the large displacement of A-site cations in  $\text{PbHfO}_3$  ceramics. Corrections have been made in the revised version and supporting information.

**Table S3.** The free energy coefficients of PHTx ceramics.

| Composition(x mol%)                             | PHT0 | PHT0.5 | PHT1 | PHT2 | PHT3 | PHT4 |
|-------------------------------------------------|------|--------|------|------|------|------|
| $a_1(10^6 \text{ N m C}^{-2})$                  | 3.5  | 3.5    | 3.5  | 3.5  | 3.5  | 3.5  |
| $a_{11}(10^6 \text{ N m}^6 \text{ C}^{-4})$     | 20.0 | 20.0   | 5.0  | 5.0  | 5.0  | 5.0  |
| $a_{111}(10^6 \text{ N m}^{10} \text{ C}^{-6})$ | 40.0 | 40.0   | 20.0 | 20.0 | 40.0 | 40.0 |
| $g(10^6 \text{ N m C}^{-2})$                    | 35.0 | 24.5   | 19.3 | 14.0 | 14.0 | 10.5 |

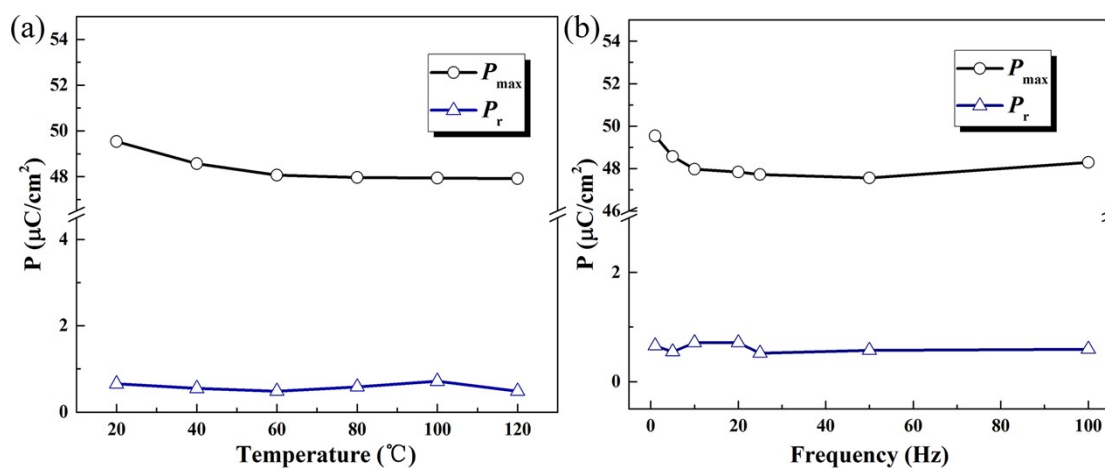

Fig. S5  $P_{\max}$  and  $P_r$  of PHT1 composition as a function of (a) temperature (20-120  $^{\circ}\text{C}$ ) and (b) frequency (1-100 Hz).
